# Supplementary material
Source: ML conference proceedings conference paper supplement (https://openreview.net/forum?id=Wis-_MNpr4)
Supplement: supplementary_material [file attachment]

---

## DATASETS, PARAMETERS, AND MODELS

### DATASETS

We used CIFAR-10 (Krizhevsky et al., 2009) that has 50,000 training  $32 \times 32$  images evenly distributed between 10 categories and 10,000 test images, CIFAR-100 (Krizhevsky et al., 2009) has the same number of images as CIFAR-10 but the images are under 100 classes. The largest dataset we used for inference is ImageNet (Russakovsky et al., 2015) with about 1.2 million training images, 50,000 validation images, and 100,000 test images that are distributed into 1000 object classes.

For all the aforementioned datasets the preprocessing phase consists of three steps summarized in the table below:

Table 1: Preprocessing Parameters

|                  |                                                                                          |
|------------------|------------------------------------------------------------------------------------------|
| <b>CIFAR-10</b>  | Horizontal Flip with P=0.5                                                               |
|                  | Images are cropped at a random place                                                     |
|                  | Normalization (three channels) mean = [0.485, 0.456, 0.406], std = [0.229, 0.224, 0.225] |
| <b>CIFAR-100</b> | Horizontal flip with P=0.5                                                               |
|                  | Images are cropped at a random place                                                     |
|                  | Normalization (three channels) mean=[0.507, 0.487, 0.441], std=[0.267, 0.256, 0.276]     |
| <b>ImageNet</b>  | Horizontal flip with P=0.5                                                               |
|                  | Images are cropped at a random place                                                     |
|                  | Normalization (three channels) mean=[0.485, 0.456, 0.406], std=[0.229, 0.224, 0.225]     |

### TRAINING PARAMETERS

For the three dataset and three models we used the training parameters are reported in the table 2.

Table 2: Training Parameters

|               | VGG16    |           | ResNet152, ResNet50 |           | MobileNetV2 |           |
|---------------|----------|-----------|---------------------|-----------|-------------|-----------|
| Parameters    | CIFAR-10 | CIFAR-100 | CIFAR-10            | CIFAR-100 | CIFAR-10    | CIFAR-100 |
| Batch-size    | 128      | 128       | 128                 | 128       | 128         | 128       |
| Learning Rate | 0.01     | 0.01      | 0.01                | 0.01      | 0.01        | 0.01      |
| Stepsize      | 200      | 60        | 200                 | 30        | 200         | 60        |
| lambda        | 0.1      | 0.02      | 0                   | 0.02      | 0.1         | 0.2       |
| Momentum      | 0        | 0.9       | 0                   | 0.9       | 0           | 0.9       |
| Weight Decay  | 0        | 0.0005    | 0                   | 0.0005    | 0           | 0.0005    |
| Dropout       | 0.5      | 0.5       | 0.5                 | 0.5       | 0.2         | 0.2       |

For inference implementations the pretrained models with the above are used.

### MODELS

We used different models for our experiments. VGG16 (Simonyan & Zisserman, 2014), ResNet152, ResNet50 (He et al., 2016) are chosen because of their enormous parameter size. However, MobileNetV2 (Sandler et al., 2018; Howard et al., 2017) is implemented and analyzed because it is the worst-case benchmark for our model as it reduces its linear operations considerably.

Model details including the description, output shape and number of parameters are reported in table 3, ??, 5.

Table 3: VGG16 Architecture

---

| Layer (type)                  | Output Shape          | Param #   |
|-------------------------------|-----------------------|-----------|
| input_4 (InputLayer)          | (None, 224, 224, 3)   | 0         |
| block1_conv1 (Conv2D)         | (None, 224, 224, 64)  | 1792      |
| block1_conv2 (Conv2D)         | (None, 224, 224, 64)  | 36928     |
| block1_pool (MaxPooling2D)    | (None, 112, 112, 64)  | 0         |
| block2_conv1 (Conv2D)         | (None, 112, 112, 128) | 73856     |
| block2_conv2 (Conv2D)         | (None, 112, 112, 128) | 147584    |
| block2_pool (MaxPooling2D)    | (None, 56, 56, 128)   | 0         |
| block3_conv1 (Conv2D)         | (None, 56, 56, 256)   | 295168    |
| block3_conv2 (Conv2D)         | (None, 56, 56, 256)   | 590080    |
| block3_conv3 (Conv2D)         | (None, 56, 56, 256)   | 590080    |
| block3_pool (MaxPooling2D)    | (None, 28, 28, 256)   | 0         |
| block4_conv1 (Conv2D)         | (None, 28, 28, 512)   | 1180160   |
| block4_conv2 (Conv2D)         | (None, 28, 28, 512)   | 2359808   |
| block4_conv3 (Conv2D)         | (None, 28, 28, 512)   | 2359808   |
| block4_pool (MaxPooling2D)    | (None, 14, 14, 512)   | 0         |
| block5_conv1 (Conv2D)         | (None, 14, 14, 512)   | 2359808   |
| block5_conv2 (Conv2D)         | (None, 14, 14, 512)   | 2359808   |
| block5_conv3 (Conv2D)         | (None, 14, 14, 512)   | 2359808   |
| block5_pool (MaxPooling2D)    | (None, 7, 7, 512)     | 0         |
| flatten (Flatten)             | (None, 25088)         | 0         |
| fc1 (Dense)                   | (None, 4096)          | 102764544 |
| fc2 (Dense)                   | (None, 4096)          | 16781312  |
| predictions (Dense)           | (None, 1000)          | 4097000   |
| Total params: 138,357,544     |                       |           |
| Trainable params: 138,357,544 |                       |           |
| Non-trainable params: 0       |                       |           |

Table 4: Architectures for ImageNet. Building blocks are shown in brackets, with the numbers of blocks stacked. Downsampling is performed by conv3\_1, conv4\_1, and conv5\_1 with a stride of 2 (He et al., 2016)

| layer name | output size | 18-layer                                                                    | 34-layer                                                                    | 50-layer                                                                                        | 101-layer                                                                                        | 152-layer                                                                                        |
|------------|-------------|-----------------------------------------------------------------------------|-----------------------------------------------------------------------------|-------------------------------------------------------------------------------------------------|--------------------------------------------------------------------------------------------------|--------------------------------------------------------------------------------------------------|
| conv1      | 112×112     | 7×7, 64, stride 2                                                           |                                                                             |                                                                                                 |                                                                                                  |                                                                                                  |
| conv2_x    | 56×56       | 3×3 max pool, stride 2                                                      |                                                                             |                                                                                                 |                                                                                                  |                                                                                                  |
|            |             | $\begin{bmatrix} 3 \times 3, 64 \\ 3 \times 3, 64 \end{bmatrix} \times 2$   | $\begin{bmatrix} 3 \times 3, 64 \\ 3 \times 3, 64 \end{bmatrix} \times 3$   | $\begin{bmatrix} 1 \times 1, 64 \\ 3 \times 3, 64 \\ 1 \times 1, 256 \end{bmatrix} \times 3$    | $\begin{bmatrix} 1 \times 1, 64 \\ 3 \times 3, 64 \\ 1 \times 1, 256 \end{bmatrix} \times 3$     | $\begin{bmatrix} 1 \times 1, 64 \\ 3 \times 3, 64 \\ 1 \times 1, 256 \end{bmatrix} \times 3$     |
| conv3_x    | 28×28       | $\begin{bmatrix} 3 \times 3, 128 \\ 3 \times 3, 128 \end{bmatrix} \times 2$ | $\begin{bmatrix} 3 \times 3, 128 \\ 3 \times 3, 128 \end{bmatrix} \times 4$ | $\begin{bmatrix} 1 \times 1, 128 \\ 3 \times 3, 128 \\ 1 \times 1, 512 \end{bmatrix} \times 4$  | $\begin{bmatrix} 1 \times 1, 128 \\ 3 \times 3, 128 \\ 1 \times 1, 512 \end{bmatrix} \times 4$   | $\begin{bmatrix} 1 \times 1, 128 \\ 3 \times 3, 128 \\ 1 \times 1, 512 \end{bmatrix} \times 8$   |
| conv4_x    | 14×14       | $\begin{bmatrix} 3 \times 3, 256 \\ 3 \times 3, 256 \end{bmatrix} \times 2$ | $\begin{bmatrix} 3 \times 3, 256 \\ 3 \times 3, 256 \end{bmatrix} \times 6$ | $\begin{bmatrix} 1 \times 1, 256 \\ 3 \times 3, 256 \\ 1 \times 1, 1024 \end{bmatrix} \times 6$ | $\begin{bmatrix} 1 \times 1, 256 \\ 3 \times 3, 256 \\ 1 \times 1, 1024 \end{bmatrix} \times 23$ | $\begin{bmatrix} 1 \times 1, 256 \\ 3 \times 3, 256 \\ 1 \times 1, 1024 \end{bmatrix} \times 36$ |
| conv5_x    | 7×7         | $\begin{bmatrix} 3 \times 3, 512 \\ 3 \times 3, 512 \end{bmatrix} \times 2$ | $\begin{bmatrix} 3 \times 3, 512 \\ 3 \times 3, 512 \end{bmatrix} \times 3$ | $\begin{bmatrix} 1 \times 1, 512 \\ 3 \times 3, 512 \\ 1 \times 1, 2048 \end{bmatrix} \times 3$ | $\begin{bmatrix} 1 \times 1, 512 \\ 3 \times 3, 512 \\ 1 \times 1, 2048 \end{bmatrix} \times 3$  | $\begin{bmatrix} 1 \times 1, 512 \\ 3 \times 3, 512 \\ 1 \times 1, 2048 \end{bmatrix} \times 3$  |
|            | 1×1         | average pool, 1000-d fc, softmax                                            |                                                                             |                                                                                                 |                                                                                                  |                                                                                                  |
| FLOPs      |             | $1.8 \times 10^9$                                                           | $3.6 \times 10^9$                                                           | $3.8 \times 10^9$                                                                               | $7.6 \times 10^9$                                                                                | $11.3 \times 10^9$                                                                               |

Table 5: MobileNetV2 Architecture

| Layer (type)         | Output Shape        | Param # |
|----------------------|---------------------|---------|
| input_1 (InputLayer) | (None, 224, 224, 3) | 0       |

|                                                |                      |       |
|------------------------------------------------|----------------------|-------|
| Conv1_pad (ZeroPadding2D)                      | (None, 225, 225, 3)  | 0     |
| Conv1 (Conv2D)                                 | (None, 112, 112, 32) | 864   |
| Conv1_relu (ReLU)                              | (None, 112, 112, 32) | 0     |
| expanded_conv_depthwise (DepthwiseConvolution) | (None, 112, 112, 32) | 288   |
| expanded_conv_depthwise_relu (ReLU)            | (None, 112, 112, 32) | 0     |
| expanded_conv_project (Conv2D)                 | (None, 112, 112, 16) | 512   |
| block_1_expand (Conv2D)                        | (None, 112, 112, 96) | 1536  |
| block_1_expand_relu (ReLU)                     | (None, 112, 112, 96) | 0     |
| block_1_pad (ZeroPadding2D)                    | (None, 113, 113, 96) | 0     |
| block_1_depthwise (DepthwiseCon)               | (None, 56, 56, 96)   | 864   |
| block_1_depthwise_relu (ReLU)                  | (None, 56, 56, 96)   | 0     |
| block_1_project (Conv2D)                       | (None, 56, 56, 24)   | 2304  |
| block_2_expand (Conv2D)                        | (None, 56, 56, 144)  | 3456  |
| block_2_expand_relu (ReLU)                     | (None, 56, 56, 144)  | 0     |
| block_2_depthwise (DepthwiseConvolution)       | (None, 56, 56, 144)  | 1296  |
| block_2_depthwise_relu (ReLU)                  | (None, 56, 56, 144)  | 0     |
| block_2_project (Conv2D)                       | (None, 56, 56, 24)   | 3456  |
| block_2_add (Add)                              | (None, 56, 56, 24)   | 0     |
| block_3_expand (Conv2D)                        | (None, 56, 56, 144)  | 3456  |
| block_3_expand_relu (ReLU)                     | (None, 56, 56, 144)  | 0     |
| block_3_pad (ZeroPadding2D)                    | (None, 57, 57, 144)  | 0     |
| block_3_depthwise (DepthwiseConvolution)       | (None, 28, 28, 144)  | 1296  |
| block_3_depthwise_relu (ReLU)                  | (None, 28, 28, 144)  | 0     |
| block_3_project (Conv2D)                       | (None, 28, 28, 32)   | 4608  |
| block_4_expand (Conv2D)                        | (None, 28, 28, 192)  | 6144  |
| block_4_expand_relu (ReLU)                     | (None, 28, 28, 192)  | 0     |
| block_4_depthwise (DepthwiseConvolution)       | (None, 28, 28, 192)  | 1728  |
| block_4_depthwise_relu (ReLU)                  | (None, 28, 28, 192)  | 0     |
| block_4_project (Conv2D)                       | (None, 28, 28, 32)   | 6144  |
| block_4_add (Add)                              | (None, 28, 28, 32)   | 0     |
| block_5_expand (Conv2D)                        | (None, 28, 28, 192)  | 6144  |
| block_5_expand_relu (ReLU)                     | (None, 28, 28, 192)  | 0     |
| block_5_depthwise (DepthwiseConvolution)       | (None, 28, 28, 192)  | 1728  |
| block_5_depthwise_relu (ReLU)                  | (None, 28, 28, 192)  | 0     |
| block_5_project (Conv2D)                       | (None, 28, 28, 32)   | 6144  |
| block_5_add (Add)                              | (None, 28, 28, 32)   | 0     |
| block_6_expand (Conv2D)                        | (None, 28, 28, 192)  | 6144  |
| block_6_expand_relu (ReLU)                     | (None, 28, 28, 192)  | 0     |
| block_6_pad (ZeroPadding2D)                    | (None, 29, 29, 192)  | 0     |
| block_6_depthwise (DepthwiseConvolution)       | (None, 14, 14, 192)  | 1728  |
| block_6_depthwise_relu (ReLU)                  | (None, 14, 14, 192)  | 0     |
| block_6_project (Conv2D)                       | (None, 14, 14, 64)   | 12288 |
| block_7_expand (Conv2D)                        | (None, 14, 14, 384)  | 24576 |
| block_7_expand_relu (ReLU)                     | (None, 14, 14, 384)  | 0     |
| block_7_depthwise (DepthwiseConvolution)       | (None, 14, 14, 384)  | 3456  |
| block_7_depthwise_relu (ReLU)                  | (None, 14, 14, 384)  | 0     |
| block_7_project (Conv2D)                       | (None, 14, 14, 64)   | 24576 |
| block_7_add (Add)                              | (None, 14, 14, 64)   | 0     |
| block_8_expand (Conv2D)                        | (None, 14, 14, 384)  | 24576 |
| block_8_expand_relu (ReLU)                     | (None, 14, 14, 384)  | 0     |
| block_8_depthwise (DepthwiseConvolution)       | (None, 14, 14, 384)  | 3456  |

|                                           |                     |        |
|-------------------------------------------|---------------------|--------|
| block_8_depthwise_relu (ReLU)             | (None, 14, 14, 384) | 0      |
| block_8_project (Conv2D)                  | (None, 14, 14, 64)  | 24576  |
| block_8_add (Add)                         | (None, 14, 14, 64)  | 0      |
| block_9_expand (Conv2D)                   | (None, 14, 14, 384) | 24576  |
| block_9_expand_relu (ReLU)                | (None, 14, 14, 384) | 0      |
| block_9_depthwise (DepthwiseConvolution)  | (None, 14, 14, 384) | 3456   |
| block_9_depthwise_relu (ReLU)             | (None, 14, 14, 384) | 0      |
| block_9_project (Conv2D)                  | (None, 14, 14, 64)  | 24576  |
| block_9_add (Add)                         | (None, 14, 14, 64)  | 0      |
| block_10_expand (Conv2D)                  | (None, 14, 14, 384) | 24576  |
| block_10_expand_relu (ReLU)               | (None, 14, 14, 384) | 0      |
| block_10_depthwise (DepthwiseConvolution) | (None, 14, 14, 384) | 3456   |
| block_10_depthwise_relu (ReLU)            | (None, 14, 14, 384) | 0      |
| block_10_project (Conv2D)                 | (None, 14, 14, 96)  | 36864  |
| block_11_expand (Conv2D)                  | (None, 14, 14, 576) | 55296  |
| block_11_expand_relu (ReLU)               | (None, 14, 14, 576) | 0      |
| block_11_depthwise (DepthwiseConvolution) | (None, 14, 14, 576) | 5184   |
| block_11_depthwise_relu (ReLU)            | (None, 14, 14, 576) | 0      |
| block_11_project (Conv2D)                 | (None, 14, 14, 96)  | 55296  |
| block_11_add (Add)                        | (None, 14, 14, 96)  | 0      |
| block_12_expand (Conv2D)                  | (None, 14, 14, 576) | 55296  |
| block_12_expand_relu (ReLU)               | (None, 14, 14, 576) | 0      |
| block_12_depthwise (DepthwiseConvolution) | (None, 14, 14, 576) | 5184   |
| block_12_depthwise_relu (ReLU)            | (None, 14, 14, 576) | 0      |
| block_12_project (Conv2D)                 | (None, 14, 14, 96)  | 55296  |
| block_12_add (Add)                        | (None, 14, 14, 96)  | 0      |
| block_13_expand (Conv2D)                  | (None, 14, 14, 576) | 55296  |
| block_13_expand_relu (ReLU)               | (None, 14, 14, 576) | 0      |
| block_13_pad (ZeroPadding2D)              | (None, 15, 15, 576) | 0      |
| block_13_depthwise (DepthwiseConvolution) | (None, 7, 7, 576)   | 5184   |
| block_13_depthwise_relu (ReLU)            | (None, 7, 7, 576)   | 0      |
| block_13_project (Conv2D)                 | (None, 7, 7, 160)   | 92160  |
| block_14_expand (Conv2D)                  | (None, 7, 7, 960)   | 153600 |
| block_14_expand_relu (ReLU)               | (None, 7, 7, 960)   | 0      |
| block_14_depthwise (DepthwiseConvolution) | (None, 7, 7, 960)   | 8640   |
| block_14_depthwise_relu (ReLU)            | (None, 7, 7, 960)   | 0      |
| block_14_project (Conv2D)                 | (None, 7, 7, 160)   | 153600 |
| block_14_add (Add)                        | (None, 7, 7, 160)   | 0      |
| block_15_expand (Conv2D)                  | (None, 7, 7, 960)   | 153600 |
| block_15_expand_relu (ReLU)               | (None, 7, 7, 960)   | 0      |
| block_15_depthwise (DepthwiseConvolution) | (None, 7, 7, 960)   | 8640   |
| block_15_depthwise_relu (ReLU)            | (None, 7, 7, 960)   | 0      |
| block_15_project (Conv2D)                 | (None, 7, 7, 160)   | 153600 |
| block_15_add (Add)                        | (None, 7, 7, 160)   | 0      |
| block_16_expand (Conv2D)                  | (None, 7, 7, 960)   | 153600 |
| block_16_expand_relu (ReLU)               | (None, 7, 7, 960)   | 0      |
| block_16_depthwise (DepthwiseConvolution) | (None, 7, 7, 960)   | 8640   |
| block_16_depthwise_relu (ReLU)            | (None, 7, 7, 960)   | 0      |
| block_16_project (Conv2D)                 | (None, 7, 7, 320)   | 307200 |
| Conv_1 (Conv2D)                           | (None, 7, 7, 1280)  | 409600 |
| out_relu (ReLU)                           | (None, 7, 7, 1280)  | 0      |

---

|                                              |              |         |
|----------------------------------------------|--------------|---------|
| global_average_pooling2d (GlobalAveragePool) | (None, 1280) | 0       |
| Logits (Dense)                               | (None, 1000) | 1281000 |
| Total params: 3,538,984                      |              |         |
| Trainable params: 3,504,872                  |              |         |
| Non-trainable params: 34,112                 |              |         |

## REFERENCES

- Kaiming He, Xiangyu Zhang, Shaoqing Ren, and Jian Sun. Deep residual learning for image recognition. In *Proceedings of the IEEE conference on computer vision and pattern recognition*, pp. 770–778, 2016.
- Andrew G Howard, Menglong Zhu, Bo Chen, Dmitry Kalenichenko, Weijun Wang, Tobias Weyand, Marco Andreetto, and Hartwig Adam. Mobilenets: Efficient convolutional neural networks for mobile vision applications. *arXiv preprint arXiv:1704.04861*, 2017.
- Alex Krizhevsky, Geoffrey Hinton, et al. Learning multiple layers of features from tiny images. online: <http://www.cs.toronto.edu/kriz/cifar.html>, 2009.
- Olga Russakovsky, Jia Deng, Hao Su, Jonathan Krause, Sanjeev Satheesh, Sean Ma, Zhiheng Huang, Andrej Karpathy, Aditya Khosla, Michael Bernstein, et al. Imagenet large scale visual recognition challenge. *International journal of computer vision*, 115(3):211–252, 2015.
- Mark Sandler, Andrew Howard, Menglong Zhu, Andrey Zhmoginov, and Liang-Chieh Chen. Mobilenetv2: Inverted residuals and linear bottlenecks. In *Proceedings of the IEEE conference on computer vision and pattern recognition*, pp. 4510–4520, 2018.
- Karen Simonyan and Andrew Zisserman. Very deep convolutional networks for large-scale image recognition. *arXiv preprint arXiv:1409.1556*, 2014.
